# Supplementary material for: Ozone Sensing by In2O3 Films Modified with Rh: Dimension Effect
Source: MDPI journal article supplement (doi:10.3390/s21051886), 2021-03-08
Supplement: s1 [file s1]

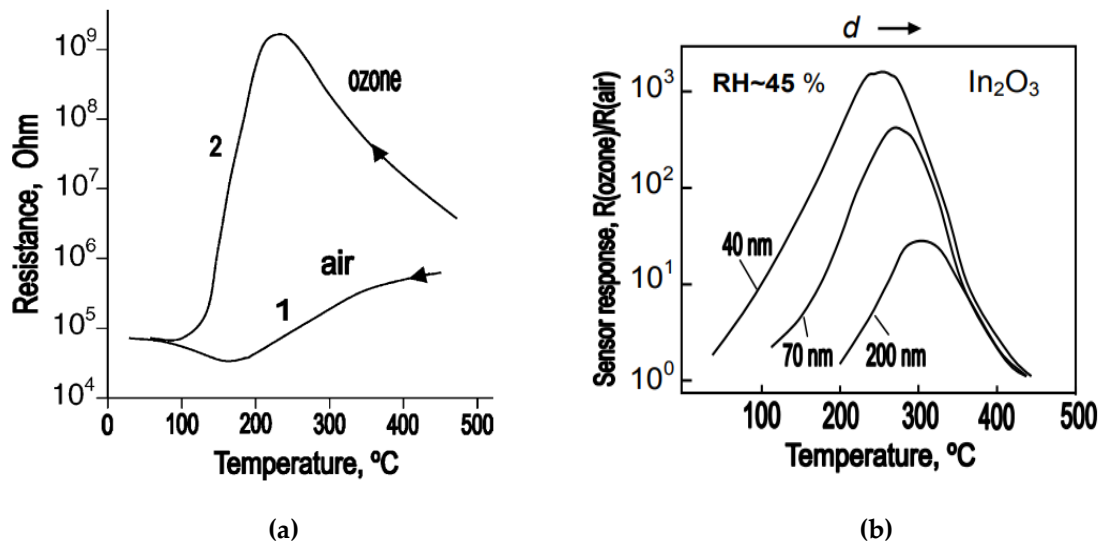

Figure S1. (a) Temperature dependencies of the  $\text{In}_2\text{O}_3$  film resistance during ozone detection ( $T_{\text{pyr}} = 475$   $^{\circ}\text{C}$ ;  $d \sim 40$  nm): (1) air; (2) air + ozone (1 ppm); (b) Film thickness influence on temperature dependencies of  $\text{In}_2\text{O}_3$ -based sensors response to ozone.  $T_{\text{pyr}} = 475$   $^{\circ}\text{C}$ . More detail information one can find in [28, 29, 40].

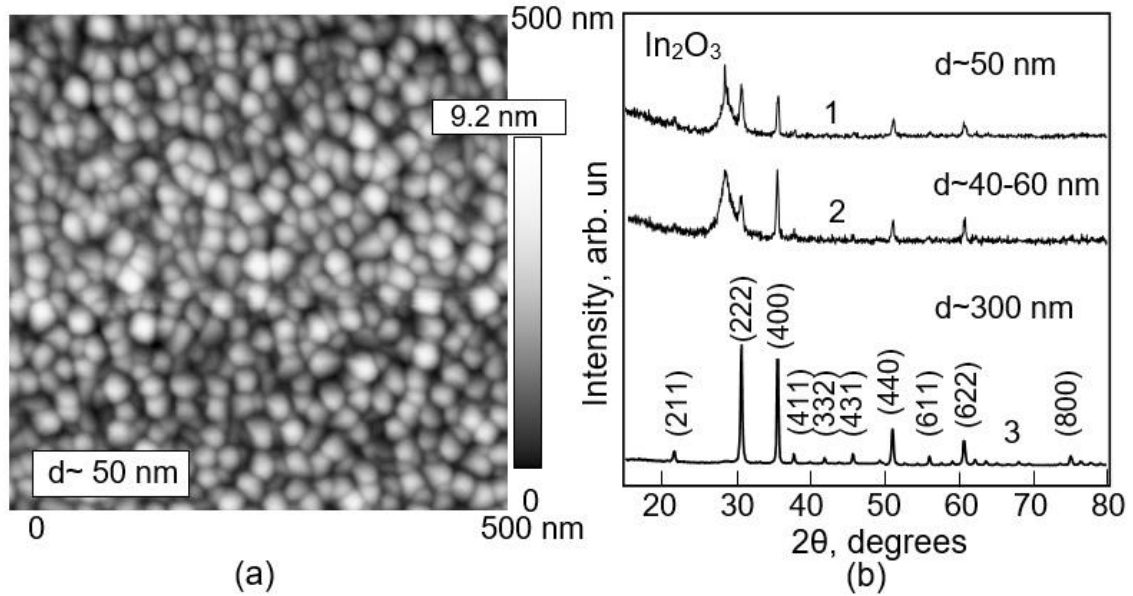

Figure S2. (a) - Typical AFM image of thin  $\text{In}_2\text{O}_3$  films deposited by spray pyrolysis at  $T_{\text{pyr}} = 450-475$   $^{\circ}\text{C}$ ; (b) XRD patterns and its Miller indices on each diffraction peak for  $\text{In}_2\text{O}_3$  films deposited in different conditions: 1-  $d \sim 50$  nm,  $T_{\text{pyr}} = 350-400$   $^{\circ}\text{C}$ ; 2 - 1-  $d \sim 40-60$  nm,  $T_{\text{pyr}} = 450-500$   $^{\circ}\text{C}$ ; 3 - 1-  $d \sim 300$  nm,  $T_{\text{pyr}} = 400-425$   $^{\circ}\text{C}$ . [21].

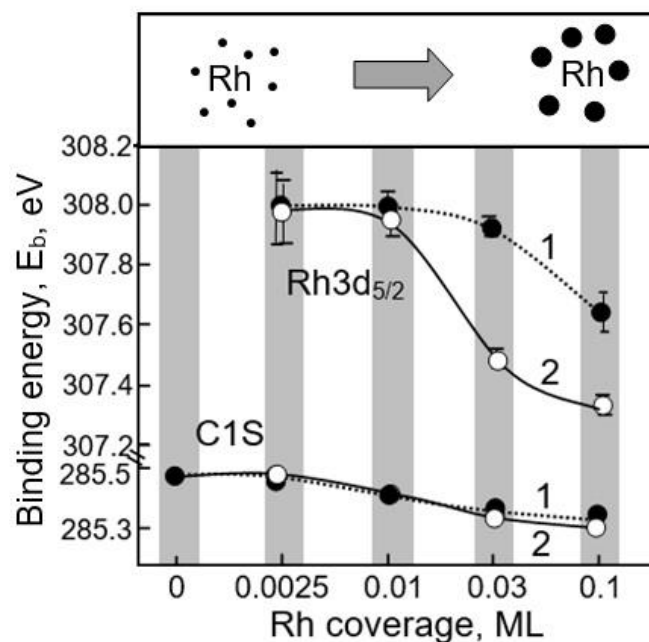

Figure S3. The effect of Rh deposition on the In<sub>2</sub>O<sub>3</sub> surface on binding energies of Rh3d<sub>5/2</sub> and C1s. 1 - LT In<sub>2</sub>O<sub>3</sub> films; 2 - HT In<sub>2</sub>O<sub>3</sub> films. X-ray photoelectron spectroscopy (XPS) experiments were performed by using an Omicron EA 125 multichannel hemispherical analyzer with Mg K $\alpha$  line (1253.6 eV) as a primary photon source. The photoelectron spectra of In3d, O1s, C1s, and Rh3d core levels were acquired at normal emission of the photoelectrons with respect to the sample surface. The measurement methodology and the results obtained during XPS study of Rh/In<sub>2</sub>O<sub>3</sub> films are described in more detail in [21].

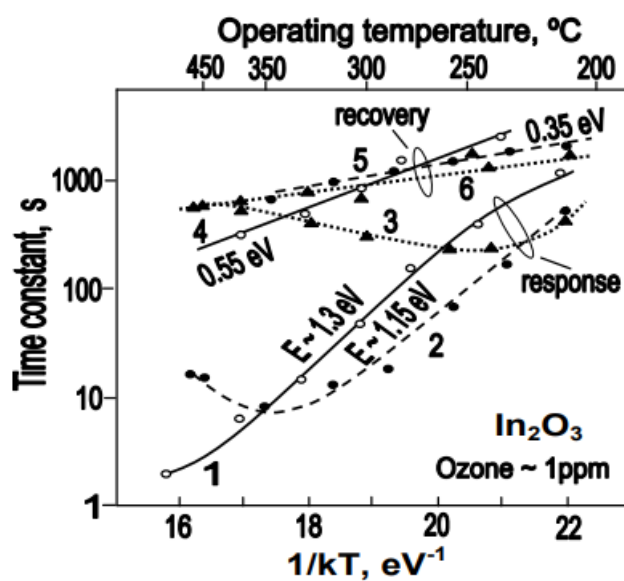

Figure S4. Influence the air humidity on temperature dependencies of (1-3) response and (4-6) recovery times during ozone detection by In<sub>2</sub>O<sub>3</sub>-based sensors: (1,4)~0.5% RH; (2,5)~25-30 RH; (3,6)~60%RH;  $T_{\text{pyr}}=475$  °C;  $d \sim 200$  nm; 1.0 M InCl<sub>3</sub>-solution. More detail information regarding kinetics of conductivity response of In<sub>2</sub>O<sub>3</sub>-based sensors one can find in [29, 31, 40, 41].

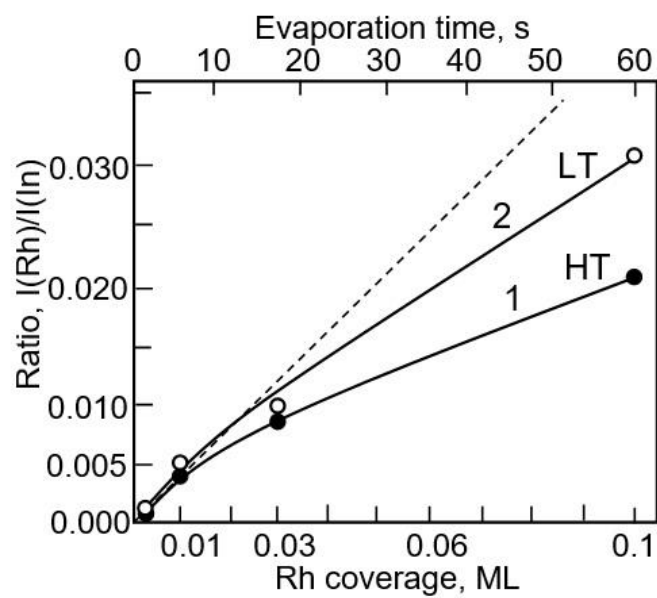

Figure S5. The effect of rhodium coverage on the intensity of XRS Rh3d5/2 peaks normalized to the intensity of XRS In3d5/2 peaks: 1 - HT In<sub>2</sub>O<sub>3</sub> films; 2 - LT In<sub>2</sub>O<sub>3</sub> films. [21].
